# Supplementary material for: IL-22BP dictates characteristics of Peyer’s patch follicle-associated epithelium for antigen uptake
Source: PubMed Central journal article supplement — J Exp Med. 2017 Jun 5;214(6):1607–18. doi: 10.1084/jem.20160770 (PMC5460992; doi:10.1084/jem.20160770), 2017-06-05
Supplement: JEM_20160770_sm.pdf [file JEM_20160770_sm.pdf]

SUPPLEMENTAL MATERIAL

Jinnohara et al., <https://doi.org/10.1084/jem.20160770>

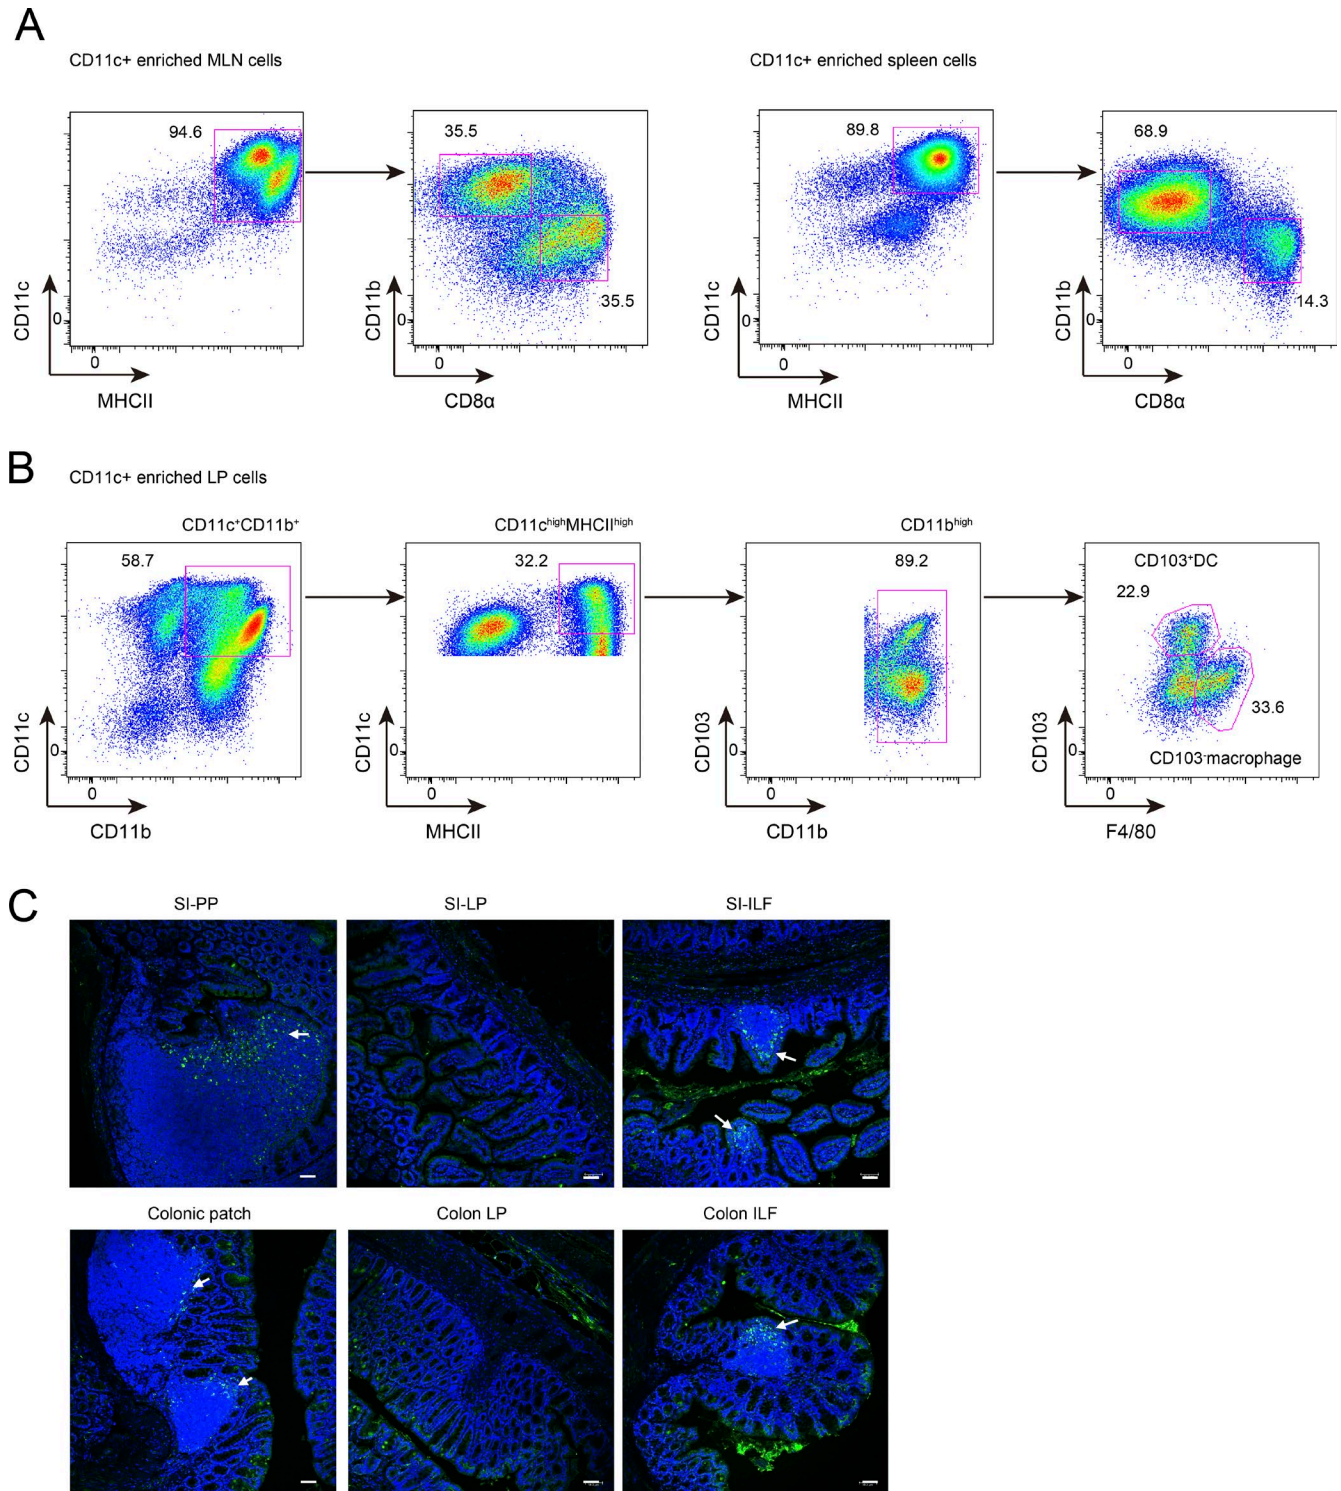

Figure S1. **Analysis of IL-22BP expression in intestine and lymphoid tissues.** (A) Gating strategy for DCs of the MLN and spleen. CD11c-enriched cells were stained with antibodies, and  $CD3^{-}B220^{-}CD45^{+}$  cells were gated by the expression of CD11c and MHCII. Then, indicated populations were sorted. (B) Gating strategy for DCs and macrophages of the LP is shown. CD11c-enriched cells were stained with antibodies, and  $CD3^{-}B220^{-}CD45^{+}$  cells were gated by the expression of CD11c and CD11b. Then, indicated populations were sorted. Data were pooled from three independent experiments. (C) Immunostaining of IL-22BP protein in small intestinal (SI) tissue sections. Green colors indicate IL-22BP. Signals in the lumen and apex of epithelial cells represent nonspecific binding of anti-IL-22BP antibodies. Arrows indicate IL-22BP-positive cells in the SED region of the PP, isolated lymphoid follicle (ILF), or colonic patch. Data are pooled from at least three mice. Bars, 50  $\mu$ m.

A

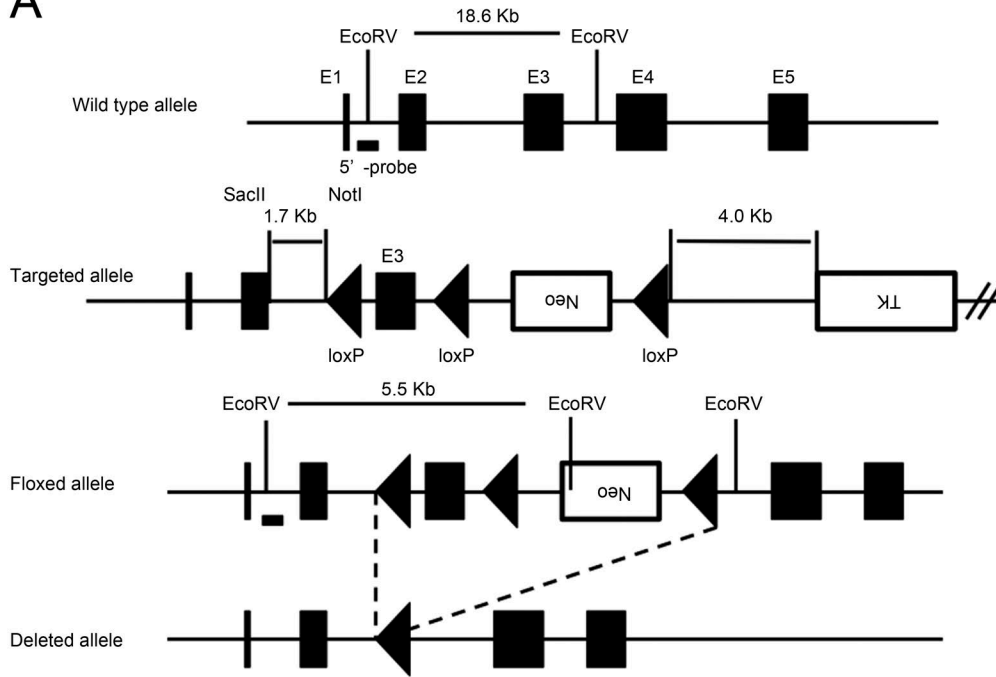

B

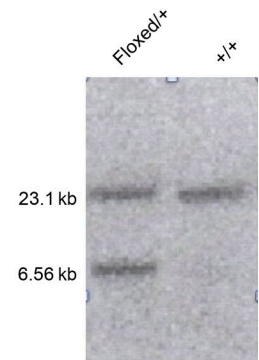

C

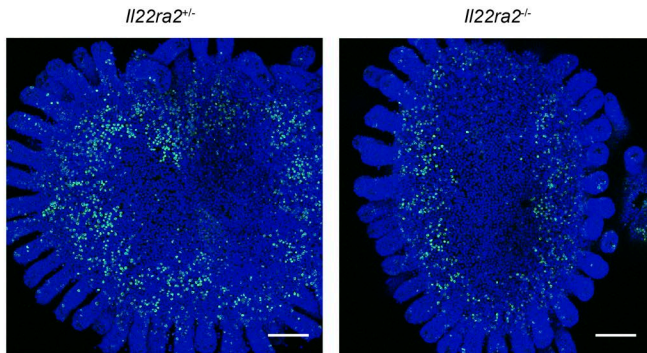

Figure S2. **Generation of IL-22BP-deficient mice.** (A) The targeting strategy for the *Il22ra2* gene is shown. Exon 3 was flanked by loxP and deleted by crossing with CAG-Cre transgenic mice. (B) Successful targeting of *Il22ra2* was confirmed by Southern blotting analysis. (C) EdU-incorporating cells in the FAE. EdU was intraperitoneally injected to *Il22ra2*<sup>+/+</sup> and *Il22ra2*<sup>-/-</sup> mice, and 48 h after injection, EdU-positive cells of the FAE were examined. Data are pooled from three mice of each genotype. Bars, 100  $\mu$ m.

Table S1. Primer sequences used for this study

| Primer name               | Sequence (5'–3')                  |
|---------------------------|-----------------------------------|
| <i>Ii22ra2</i> in situ Fw | ATAGGATCCATGATGCCTAAGCATTGCCTTCTA |
| <i>Ii22ra2</i> in situ Rv | TGACTCGAGTGGAAATGTCACACATCTCTCCT  |
| <i>Gapdh</i> qPCR Fw      | TGTGTCCGTCGTGGATCTGA              |
| <i>Gapdh</i> qPCR Rv      | TTGCTGTTGAAGTCGCAGGAG             |
| <i>Actb</i> qPCR Fw       | GATCTGGCACCACACCTTCT              |
| <i>Actb</i> qPCR Rv       | GGGGTGTGAAGTCTCAA                 |
| <i>Ii22</i> qPCR Fw       | TGACGACCAGAACATCCAGA              |
| <i>Ii22</i> qPCR Rv       | AGCTTCTTCTCGCTCAGACG              |
| <i>Ii22ra1</i> qPCR Fw    | TGCTCTTTTCCATGGGTTTC              |
| <i>Ii22ra1</i> qPCR Rv    | AAGCGTAGGGGTTGAAAGGT              |
| <i>Ii22ra2</i> qPCR Fw    | TATTTTGACTGGCAAGCAG               |
| <i>Ii22ra2</i> qPCR Rv    | CCCATTGGCTCTGTCCATAC              |
| <i>Gp2</i> qPCR Fw        | GATACTGCACAGACCCCTCCA             |
| <i>Gp2</i> qPCR Rv        | GCAGTCCGGTCATTGAGGTA              |
| <i>Spib</i> qPCR Fw       | AGCGCATGACGTATCAGAAGC             |
| <i>Spib</i> qPCR Rv       | GGAATCCTATACACGGCACAGG            |
| <i>Ccl20</i> qPCR Fw      | AAAAGGGCTGTGAACCTCCT              |
| <i>Ccl20</i> qPCR Rv      | ACCCCAGCTGTGATCATTTT              |
| <i>Cxcl16</i> qPCR Fw     | GTGGGTCGGTGAAGTACTAGTG            |
| <i>Cxcl16</i> qPCR Rv     | ACTGGCTTGAGGCAAATGTT              |
| <i>Psg18</i> qPCR Fw      | AGCAACGAAGTCCATCATCAGAG           |
| <i>Psg18</i> qPCR Rv      | AAGAGCCAACGGATGGAGATC             |
| <i>Reg3g</i> qPCR Fw      | CCTGTGCTCCTTTCTCAGG               |
| <i>Reg3g</i> qPCR Rv      | ATGTCCTGAGGGCCTCTTT               |
| <i>Muc3</i> qPCR Fw       | TTCTATGGGCCACGGTGT                |
| <i>Muc3</i> qPCR Rv       | TGGTACTGTCACACTCACTTCC            |
| <i>Fut2</i> qPCR Fw       | GCGGTTTCGTCCATTCTTA               |
| <i>Fut2</i> qPCR Rv       | AAAGTACCTGGGCACTCG                |

Fw, forward; qPCR, quantitative PCR; Rv, reverse.
